1 **Enhanced and Unified Anatomical Labeling for a Common Mouse Brain Atlas**

2

3 Uree Chon<sup>1</sup>, Daniel J. Vanselow<sup>2</sup>, Keith C. Cheng<sup>2</sup>, Yongsoo Kim<sup>1\*</sup>

4

5 <sup>1</sup>Department of Neural and Behavioral Sciences, <sup>2</sup>Department of Pathology, College of  
6 Medicine, Penn State University, Hershey, PA

7 \* corresponding author

8

9 **Abstract**

10 Anatomical atlases in standard coordinates are necessary for the interpretation and  
11 integration of research findings in a common spatial context. However, the two most-  
12 used mouse brain atlases, the Franklin and Paxinos (FP) and the common coordinate  
13 framework (CCF) from the Allen Institute for Brain Science, have accumulated  
14 inconsistencies in anatomical delineations and nomenclature, creating confusion among  
15 neuroscientists. To overcome these issues, we adopted the FP labels into the CCF to  
16 merge two labels in the single atlas framework. We used cell type specific transgenic  
17 mice and an MRI atlas to adjust and further segment our labels. Moreover, new  
18 segmentations were added to the dorsal striatum using cortico-striatal connectivity data.  
19 Lastly, we have digitized our anatomical labels based on the Allen ontology, created a  
20 web-interface for visualization, and provided tools for comprehensive comparisons  
21 between the Allen and FP labels. Our open-source labels signify a key step towards a  
22 unified mouse brain atlas.

23

24

25 **Key words (up to 10):** digital atlas, mouse brain, common coordinate framework,  
26 neuroinformatics

27

28

29

30 Corresponding author:

31

32 **Yongsoo Kim, Ph.D.**

33 Assistant Professor

34 Department of Neural and Behavioral Sciences

35 College of Medicine

36 Penn State University

37 Tel: +1-717-531-7749

38 Mailing Address:

39 500 University Drive

40 Hershey, PA. 17033-0850

41 Lab website: <https://sites.psu.edu/yongsookimlab/>

42

## 43 **Introduction**

44 Anatomical delineation of the brain is critical for elucidation of the anatomical and  
45 functional organization of the brain across species<sup>1-5</sup>. Whole brain anatomical atlases  
46 provide a spatial framework for examining, interpreting, and comparing experimental  
47 data from different studies. For mouse, the most widely used animal model to understand  
48 the mammalian brain, the two most commonly used brain atlases are the Franklin-  
49 Paxinos atlas<sup>6</sup> (in short, called “FP” hereafter) and the Allen reference atlas<sup>7,8</sup> (in short,  
50 called “Allen” hereafter). Both atlases are largely based on manual delineation by expert  
51 neuroanatomists using cytoarchitectonic features based on a variety of staining including  
52 Nissl and acetylcholine esterase antibody staining in 2D histological sections.

53 More recently, the Allen Institute for Brain Sciences released a 3D reference brain with  
54 10  $\mu\text{m}$  isotropic voxel resolution, called the common coordinate framework (CCF)<sup>9</sup>. This  
55 new reference brain marks a significant departure from classical neuroanatomy based on  
56 2D sections and provides an excellent platform for the registration of 3D mouse brain  
57 imaging datasets collected from emerging high resolution whole brain imaging modalities  
58 such as serial two-photon tomography and light sheet microscopy<sup>5,10-12</sup>. More  
59 importantly, the CCF facilitates the integration and sharing scientific data from different  
60 studies in a common spatial context<sup>13</sup>. The accompanying anatomical labels have smooth  
61 delineation across all 3D planes, which enable easy views of 3D perspective of brain  
62 regions.

63 Unfortunately, significant discrepancies exist between the anatomical labels on the Allen  
64 CCF and the FP labels. For example, these two atlases often have disagreed anatomical  
65 borders and 3D coordinates as well as different nomenclatures for same structures<sup>14,15</sup>.  
66 To make it worse, the latest labels in the CCF released in 2017 also introduced significant  
67 changes from its original Allen labels that were based on 2D Nissl stained sections. This  
68 has created confusion and mis-interpretation of experimental results<sup>16</sup>. These issues  
69 motivated us to create unified and highly segmented anatomical labels in the adult mouse  
70 brain based on the CCF. We decided to use the FP labels for our initial anatomical labels  
71 because it represents the highest degree of the segmentation in the adult mouse brain, and  
72 because a huge body of prior research is based on the FP labels. Here, we adopted the FP

73 labels into the CCF by rigorous alignment using an MRI based atlas and cell type specific  
74 transgenic mice marking for distinct anatomical areas<sup>17,18</sup>. We also further segmented  
75 labels where cell types could be distinguished within single anatomically defined regions.  
76 The resulting labels create a unique opportunity for comprehensive comparisons between  
77 the two most commonly used anatomical labels in a common CCF space. Furthermore,  
78 we used topographically distinct cortico-striatal projection patterns to add segmentations  
79 to the dorsal striatum, which is unsegmented in existing atlases.

80 Lastly, we have digitized the anatomical labels based on the Allen ontology to facilitate  
81 integration of our labels as a neuroinformatics tool<sup>9</sup>. Digitized labels combined with  
82 image registration can serve as a powerful tool to automatically quantify signal of interest  
83 across whole brain regions in a reference brain<sup>9,10,19,20</sup>. To facilitate its usage, we have  
84 made all our newly established digital map data freely available for viewing and  
85 downloading from our web-based atlas implementation at [http://kimlab.io/brain-](http://kimlab.io/brain-map/atlas/)  
86 [map/atlas/](http://kimlab.io/brain-map/atlas/).



87 **Result**

88

89 **Importing Franklin-Paxinos anatomical labels into the Allen common coordinate**  
90 **framework**

91 We used the FP labels drawn in 2D histological sections for our initial template  
92 segmentation. We first imported vector drawing map of FP labels to the Allen CCF  
93 (Figure 1A-B). Automated image registration of 2D Nissl sections from the FP atlas to  
94 the CCF has been challenging due to different background contents between the two  
95 atlases and non-uniform tissue distortion between histological sections in the FP labels.  
96 Thus, we used manual adjustment to initially align the FP labels on the CCF coronal  
97 sections with 100  $\mu\text{m}$   $z$  spacing based on the autofluorescence signals of distinct  
98 anatomical features (Figure 1B – C, yellow arrows as examples). Autofluorescent  
99 background in the CCF provides rich anatomical information in both cortical and  
100 subcortical regions. For example, distinct contrast in the barrel field provides strong  
101 evidence to delineate layer 4 for the somatosensory barrel cortex (Figure 1B-C, red  
102 arrows).

103 To further assist 2D label alignment in the context of contiguous 3D planes, we used a  
104 high resolution magnetic resonance imaging (MRI) atlas with the FP labels in most brain  
105 regions<sup>17,21,22</sup>. We first registered the MRI reference brain to the CCF and transformed  
106 the MRI labels to fit in the CCF (Figure 1D-E). Although the MRI labels are not as  
107 detailed as Nissl based FP labels, it provided an independent way to align and to further  
108 adjust our initial alignment in 3D space (Figure 1F). The MRI labels were particularly  
109 useful to align segmentations in the isocortex (also called “neocortex”) (Figure 1F).

110

111 **Fine label alignment and further segmentations using cell type-specific transgenic**  
112 **mice**

113 Previously, histological staining with specific markers (e.g., acetylcholine esterase, or  
114 parvalbumin) on 2D sections has been used to guide detailed delineation in anatomical  
115 regions<sup>6</sup>. We utilized a similar approach using 14 different transgenic mouse lines that  
116 mark specific neuronal subtypes<sup>10,18,23</sup> (called “marker brain” hereafter) to highlight  
117 anatomical boundaries otherwise often not visible in the CCF tissue autofluorescent

118 background. Marker brains imaged by STPT were registered to the CCF, and their signals  
119 were overlaid in the CCF to highlight cell type based anatomical features (Figure 2 and  
120 S1, Table S1). For example, Choline acetyltransferase (Chat)-Cre mice crossed with Cre  
121 dependent reporter mouse expressing nuclear tdTomato (Ai75) were used to delineate  
122 brain regions enriched with cholinergic neurons such as the basal forebrain and the  
123 hindbrain areas (Figure 2A)<sup>24</sup>. Parvalbumin (PV)-Cre crossed with Cre dependent  
124 reporter mouse expressing nuclear GFP (H2B-GFP) has been very useful to delineate  
125 structures in the thalamus, midbrain, and hindbrain (Figure 2B)<sup>6,25</sup>. Somatostatin (SST)-  
126 Cre crossed with the H2B-GFP reporter mouse has been useful for amygdala,  
127 hypothalamus, olfactory regions, and subcortical regions, such as the bed nucleus of the  
128 stria terminalis (BST) (Figure 2C)<sup>26</sup>. Oxytocin receptor (OTR)-Cre crossed with Cre  
129 dependent reporter mouse expressing tdTomato (Ai14) highlighted selected brain regions  
130 including dorsal endopiriform nucleus (DEn), CA2 in the hippocampus, amygdala and  
131 entorhinal regions (Figure 2D)<sup>27</sup>. Lastly, we used cortical layer specific Cre mice crossed  
132 with Ai75 to validate our cortical layer (L) delineation. We used Ctgf-Cre for L6b ,  
133 Ntsr1-Cre for L6, Rbp4-Cre for L5, and Cux2-Cre for L2/3 (Figure 2E and S1)<sup>28</sup>.  
134 Additional marker brains were utilized to delineate several more brain regions. For  
135 example, Ctgf-Cre was further used for delineations of DEn and structures of thalamus,  
136 amygdala, and isocortical areas (Figure S1). The full list of marker brains and their  
137 expression in anatomical regions is summarized in Table S1.

138 While utilizing marker brains, distinct cell populations were observed within specific  
139 substructures. We used this information as a way to further segment structures in the  
140 thalamus, hypothalamus, and hindbrain. For example, using PV-Cre and Ctgf-Cre marker  
141 brains, ventral posteromedial nucleus of the thalamus (VPM) was further segmented into  
142 dorsal and ventral parts (VPMd and VPMv, respectively) (Figure 3A). We observed  
143 densely packed cell population in VPMd in both lines, contrasting the loosely scattered  
144 cells in VPMv (yellow arrows in Figure 3A). Using OTR-Cre and Ctgf-Cre marker brains,  
145 posterior hypothalamic nucleus (PH) was segmented into nuclear dorsal and ventral parts  
146 (PHnd and PHnv, respectively) with higher expression in PHnd (Figure 3B). Lastly,  
147 medial vestibular nucleus, parvicellular part (MVp) was further divided into dorsal and

148 ventral parts (MVpd and MVpv, respectively) based on density difference from SST-Cre  
149 and PV-Cre marker brains (Figure 3C). We added 10 new subdivisions (Table S2).

150

### 151 **Long-range projection based anatomical segmentation**

152 Previously, anatomical segmentations were largely based on cytoarchitectonic features<sup>6,7</sup>.

153 Although highly useful, this approach cannot be applied to the dorsal striatum without  
154 such features. Thus, dorsal striatum remains unsegmented in both FP and Allen atlases  
155 despite its prominent size and heterogeneous functions in the brain. Recent studies has  
156 shown that different parts of the dorsal striatum receive topographically distinct cortical  
157 inputs<sup>29-31</sup>. We decided to use a similar approach to segment the dorsal striatum based on  
158 distinct cortico-striatal projections. We downloaded 129 datasets with anterograde tracing  
159 using C57bl/6 mice covering the entire isocortical areas from the Allen connectivity  
160 dataset<sup>20</sup> and registered all of these brains to the CCF (Figure 4A-B). Then, we averaged  
161 the projection datasets from the 10 different cortical regions for each anatomically  
162 distinct dorsal striatum projection pattern (Figure 4B). We superimposed the projection  
163 dataset on the CCF and delineated different striatal areas based on cortico-striatal  
164 projection data (Figure 4B). We observed different striatal regions with either distinct  
165 input from one cortical group or convergent inputs from multiple regions, which is  
166 consistent with previous studies<sup>29,30</sup>(Figure 4C-D). We added new delineations to the  
167 existing labels (Figure 4D, Table S2).

168

### 169 **Digitization and hierarchical organization of anatomical labels**

170 Digital atlases with distinct label values for each anatomical region have been very useful  
171 neuroinformatics tools to automatically quantify target signals in different anatomical  
172 regions when combined with image registration<sup>10,19</sup>. Thus, we assigned a unique ID in  
173 each label (Figure 5A-C). We adopted and arranged numerical IDs for each structure in a  
174 hierarchical manner based on the Allen ontology (Figure 5E)<sup>8</sup>. In the digitization process,  
175 we first found comparable brain regions between the FP and the Allen labels. To  
176 accommodate the higher degree of segmentation in the FP labels, 471 more structure IDs  
177 were created (Table S2). For example, PAG consists of several subdivisions that plays  
178 various functions including expression of fear behavior<sup>32</sup>. PAG, which is considered as a

179 single structure in the Allen labels, is further segmented into dorsomedial, lateral,  
180 dorsolateral, ventrolateral, pleogial, and p1 divisions (DMPAG, LPAG, DLPAG,  
181 VLPAG, PIPAG, and p1PAG, respectively) in FP labels. The boundaries of the  
182 subdivisions were delineated by observing cell density differences between each division  
183 with SST-Cre expression (Figure 5D1). Each subdivided region was given new unique  
184 numerical IDs and assigned within its parent structures (Figure 5D2, E).  
185 Since the nomenclature and abbreviations in same structures are often different between  
186 the FP and the Allen labels, we systematically compared between the two labels. For  
187 example, cingulate cortex, area 24b (A24b) in the FP labels matches to the anterior  
188 cingulate area, dorsal part (ACAd) in the Allen labels. We included the complete list of  
189 comparisons between the two labels, unique brain region IDs, and hierarchical  
190 arrangement in Table S2. This information can be utilized to compare the nomenclature  
191 within any brain regions between the two atlases.

192

### 193 **Comparison between Allen and FP based anatomical labels.**

194 Because our anatomical labels adopted from the FP labels were aligned in the Allen CCF,  
195 we can compare and contrast difference between two most commonly used anatomical  
196 labels in the same space (Figure 6). We also included the original Allen labels drawn in  
197 Nissl stained sections as additional comparison (last column of Figure 6). Our labels have  
198 overall finer segmentations than the Allen labels. For example, the zona incerta (ZI) is a  
199 part of subthalamic nucleus that plays an important role in several behaviors such as pain  
200 processing and defensive behavior<sup>33,34</sup>. We previously found that parvalbumin (PV)  
201 neurons are heavily enriched in ventral ZI<sup>10</sup>. The FP labels segmented PV enriched  
202 ventral ZI separately from dorsal ZI while both the original and the new Allen labels have  
203 only one segmentation for ZI (Figure 6A). Moreover, Allen and FP labels often use  
204 different boundaries even in similar brain regions. For example, substantia innominata  
205 (SI) in the Allen labels is a part of the basal forebrain structure that is important in  
206 attention and learning<sup>35,36</sup>. In the FP label, the matching region is composed of ventral  
207 pallidum (VP), substantia innominata basal (SIB), and extended amygdala (EA). In our  
208 marker brains, VP and EA are marked by cholinergic and somatostatin neurons,  
209 respectively (Figure 6B)<sup>24</sup>. Moreover, large portion of EA was included as a part of

210 lateral preoptic area (LPO) in the new Allen labels (but not in the original labels), which  
211 does not match with our border between hypothalamus and basal forebrain (yellow  
212 arrows in Figure 6B). Discrepancies between anatomical borders extend to many  
213 different areas including cortical areas. For example, we noticed that boundary between  
214 motor and somatosensory cortex in the latest Allen labels has been dramatically shifted  
215 from its original label (yellow arrows in Figure 6C). Our labels match better to the  
216 original Allen labels than to the latest version, consistent with the existence of layer 4 in  
217 the somatosensory area, but not in the motor area, and with patterns of cortical layer  
218 specific marker brains (Figure 6C). Moreover, the latest Allen labels simplified  
219 segmentation in some key regions that are functionally subdivided. For example, the bed  
220 nucleus of the stria terminalis (BST) in the original Allan atlas was divided into different  
221 subregions, but is no longer subdivided in the new atlas (Figure 6D4). BST subdivisions  
222 play important roles in distinctive behaviors (e.g., anxiety and social behavior) and have  
223 unique anatomical connections<sup>37-41</sup>. Our labels are highly segmented in the BST (Figure  
224 6D).

225

### 226 **Web-based atlas visualization and sharing**

227 The web-visualization platform for digital atlases enables easy identification of  
228 anatomical labels across different sections and comparison across different atlases<sup>3,13</sup>.  
229 Thus, we created a website (<http://kimlab.io/brain-map/atlas/>) to visualize and share our  
230 anatomical labels. The web visualization includes easy identification of anatomical labels  
231 in the background CCF. All labels and associated files are freely available for  
232 downloading (Supplementary File 1 and 2). This open source data sharing will facilitate  
233 to further refinement of anatomical labels and to integrate data interpretation within this  
234 single anatomical platform.

235

236

237

238

239

## 240 **Discussion**

241 Here, we present highly segmented open source anatomical labels on the Allen CCF,  
242 which are easily accessible via our website. Our labels are largely based on FP labels  
243 with new cortico-striatal projection based segmentations in dorsal striatum and further  
244 segmentations based on fluorescent transgenic markers.

245 A reference atlas serves a critical role in understanding spatial context of the brain <sup>8,10,42,43</sup>.  
246 However, independently generated atlases with different nomenclature and boundaries  
247 can make it difficult to integrate data from different studies <sup>13</sup>. Significant effort has been  
248 made to standardize a rodent brain atlas as a key neuroinformatics tool to facilitate data  
249 exchange and to enhance reproducibility between different studies <sup>3,13,44</sup>. For example,  
250 the International Neuroinformatics Coordination Facility established digital atlas  
251 infrastructure for a common spatial framework such as the scalable brain atlas under  
252 FAIR (Findable Accessible Interoperable Reproducible) principles <sup>13,44</sup>. Recently, the  
253 Allen CCF generated from iterative averaging of over 1000 different mouse brain  
254 samples provides the highest resolution 3D digital atlas platform <sup>9</sup>. There has been  
255 significant encouragement by funding agencies (e.g., BRAIN initiative) to use the CCF as  
256 a common anatomical framework for functional and anatomical studies to facilitate  
257 seamless exchange between results from different studies <sup>45</sup>. To further support this trend,  
258 new computational tools are being developed to integrate individual datasets (e.g., 3D  
259 imaging or even 2D histological sections) in the standard atlas framework <sup>37-39,46</sup>. While  
260 the CCF provides an ideal atlas platform with high resolution 3D images, its associated  
261 anatomical labels released in 2017 have been controversial due to fewer fine  
262 segmentations and significant changes in their anatomical borders from the original  
263 version. Moreover, inconsistencies in borders and nomenclatures compared to the widely  
264 used FP labels make it difficult to compare findings from studies that use different atlases.  
265 Our labels are ideally suited to resolve the issues.

266 Our strategy was to establish the FP based anatomical labels in the Allen CCF. We used a  
267 series of steps to rigorously align the FP labels in the Allen CCF. We further generated  
268 finer segmentations based on marker brains that highlight specific anatomical regions  
269 otherwise not visible in the background <sup>18</sup>. These strategies enabled us to establish highly  
270 detailed FP based labels in the Allen CCF. Our systematic comparison between the two

271 atlases marks an important first step towards a unified anatomical label in a common atlas  
272 platform. As neuroscience research becomes increasingly collaborative, it is essential to  
273 have consistency in anatomical labels to specify regions of interest. By integrating FP  
274 based labels in the CCF, our labels can be used to facilitate the comparison of anatomical  
275 interpretations from past and future studies regardless of the atlas used.

276 We also used an cortico-striatal long-range connectivity to finely segment the dorsal  
277 striatum. Projectome-based atlasing provides an alternative way to segment brain regions  
278 that do not have distinct cytoarchitectonic features. Since brain-wide projectome data are  
279 becoming increasingly available in open source platforms<sup>20,47-49</sup>, similar approaches can  
280 be used to segment other brain regions with distinct projection patterns. Moreover, since  
281 this anatomical connectivity is related to functional interactions between neural circuitry,  
282 connectivity based anatomical segmentation can provide a unique opportunity to integrate  
283 functional circuit in the anatomical map.

284 Our digitized anatomical labels can be easily integrated into data processing pipelines to  
285 automatically quantify target signals throughout anatomical regions in the whole brain.

286 We previously built such a pipeline to quantitatively map neural activity based on c-Fos  
287 induction, GABAergic cell subtypes, and long-range neural connectivity<sup>10,19,48</sup>.

288 Moreover, mapping pipelines are increasingly available for high-resolution 3D image  
289 data and histological sections<sup>11,50,51</sup>. With image registration to the CCF, our digitized  
290 labels can serve as an invaluable neuroinformatics tool to examine target signals in the FP  
291 based labels as well as the built-in Allen CCF labels.

292 Moving forward, by integrating two most popular brain segmentations in the same 3D  
293 anatomical context, it will help to build unified anatomical labels for the mouse brain in  
294 the future<sup>3,13,52</sup>. To facilitate such work, we are making all the data freely available to  
295 visualize and download via our website. We envision that similar approaches can be  
296 taken to integrate independently generated atlases within animal species including  
297 humans.

298

299



## 300 **Material and Methods**

301

### 302 **Animals**

303 All animal work has been approved by the Institutional Animal Care and Use Committee  
304 of Penn State University College of Medicine. We used following transgenic mice to  
305 fluorescently label specific cell types (marker brains). For Cre drivers, we used OT-Cre  
306 (Jax: 024234), Avptm-Cre (Jax: 023530), OTR-Cre (gift from Nishimori lab, Tohoku  
307 University). For Cre dependent reporter mice, we use Ai14 (Jax:007908). We crossed cell  
308 type specific Cre driver mice with Ai14 to create maker brains. We used both male and  
309 female mice at ~2 - 3 months old. All mice were group housed in 12/12 light/dark cycle  
310 (6am light on, 6pm off) with access to food and water ad libitum. Other marker brains  
311 were downloaded from either publically available BICCN dataset or previously published  
312 database <sup>10</sup>. Because we observed highly stereotypical expression in each marker brain,  
313 we used one representative brain per each marker line for our anatomical work. The  
314 complete list of the maker brain with their source is listed in the Table S1.

315

### 316 **Sample preparation and imaging of cell type specific transgenic mice**

317 Transgenic mice were perfused by using cardiac perfusion with 0.1M phosphate buffer  
318 (PB) followed by 4% paraformaldehyde (PFA). Brains were post-fixed with 4% PFA at  
319 4°C overnight and transferred to 0.05M PB until imaging. Detailed protocol for the STPT  
320 imaging was described previously <sup>10</sup>. Briefly, a fixed brain was embedded in oxidized 4%  
321 agarose and cross linked by 0.05M sodium borate buffer at 4°C overnight. We used  
322 Tissuecyte 1000 (Tissuevision) to perform serial two-photon tomography imaging. We  
323 used 970nm wavelength laser and acquired a series of images at 1 μm X-Y resolution in  
324 every 50 μm z sections. We used custom-built algorithms to reconstruct the whole brain.  
325 Our imaged brains and downloaded marker brains were registered to the CCF using open  
326 source program (Elastix)<sup>53</sup> as described previously <sup>10</sup>.

327

### 328 **Importing and modifying the FP labels to the Allen CCF**

329 We originally obtained vector drawing of Nissl 2D section from Paxinos and Franklin's  
330 the Mouse Brain in Stereotaxic Coordinates, 3<sup>rd</sup> edition <sup>6</sup>. We also used the 4<sup>th</sup> version to



331 incorporate latest updated labels. We used a vector drawing tool (Adobe Illustrator) for  
332 our label work. We downloaded the Allen CCF and associated labels from the Allen  
333 Institute for Brain Sciences API (<http://help.brain-map.org/display/mousebrain/API>), and  
334 generated coronal slices (10  $\mu\text{m}$  isotropic) using Image-Stacks-Reslices in FIJI (NIH).  
335 This produced 1320 Z coronal slices. Then, we selected one coronal slice in every 10  
336 slices from Z95 to Z1315 using Image-Stacks-Tools-Make Substack in FIJI, generating  
337 123 coronal images with 100  $\mu\text{m}$   $z$  spacing. We identified matching  $z$  planes between the  
338 FP atlas and the CCF using distinct anatomical landmarks (e.g., fiber track, and  
339 ventricles). To aid our label alignment in 3D, we downloaded MRI labels from different  
340 brain regions from publically available database  
341 (<https://imaging.org.au/AMBMC/AMBMC>). We combined labels from different brain  
342 regions to reconstruct the MRI labels using FIJI (NIH). Then, we registered the MRI atlas  
343 with the FP based labels to the CCF using Elastix. The MRI labels were particularly  
344 useful to align boundaries in cortical areas. We loaded cell type specific labeling from  
345 different transgenic mice and MRI labels as separate layers on the Illustrator, and used  
346 the information to further adjust anatomical delineations. To accommodate the FP labels  
347 (mostly 120  $\mu\text{m}$   $z$  spacing) in 100  $\mu\text{m}$   $z$  spacing, we used 5<sup>th</sup> section of every 6 FP labels  
348 twice in the initial alignment and used the MRI atlas and marker brains to further modify  
349 the labels across the 3D plane. Once the FP labels were imported in the matching plane of  
350 the CCF on Adobe Illustrator, we used linear translation to stretch the FP labels to fit the  
351 CCF roughly. Then, we performed finer alignment manually based on specific landmarks  
352 of the brain with distinct contrast (e.g., fiber tracts). In selected areas (e.g., hypothalamus),  
353 boundaries were removed entirely and re-drawn based on key features of the CCF and  
354 distinct cell populations. In caudal areas, we often used 2-3 different FP planes to create  
355 hybrid labels to fit the CCF background as well as cell type specific features of the  
356 selected plane.

357

### 358 **Cortico-striatal projection based segmentation in dorsal striatum**

359 We downloaded 129 datasets with anterograde virus injection in different cortical areas  
360 from C57bl/6 mouse line using Allen connectivity database ([http://help.brain-](http://help.brain-map.org/display/mouseconnectivity/API)  
361 [map.org/display/mouseconnectivity/API](http://help.brain-map.org/display/mouseconnectivity/API)). All downloaded datasets were registered to our

362 modified CCF with 100  $\mu\text{m}$   $z$  spacing using Elastix. After the image registration, we  
363 removed the autofluorescent background of each sample using binary thresholding (FIJI).  
364 We clustered projection dataset into 10 groups based on their cortical injection sites and  
365 averaged projection signals in the same group using FIJI. Then, we imported the  
366 projection data into Illustrator as separate layers and used them to further segment the  
367 dorsal striatum.

368

### 369 **Digitization of anatomical labels**

370 Our labels were first compared to segmented regions of the Allen labels. We used  
371 ontologically arranged Allen label numbering system as a template to digitize our labels  
372 (Table S2). All labels were imported onto FIJI, and each region was selected using wand  
373 tool and assigned specific anatomical identification numbers using the Process-Math-Add  
374 function. If our labels matched the Allen labels, we assigned the same Allen anatomical  
375 identification numbers. If our labels were not found in the Allen labels (e.g., finer  
376 segmentation in our labels), we assigned new unique identification numbers. If there was  
377 significantly disagreed border delineation of matching structures with similar  
378 nomenclature, we maintained the same ID number for that specific structure.

379

380

381 **Acknowledgement**

382 We thank Rhea Sullivan in helping generating cortico-striatal projectome data, and Pavel  
383 Osten and Piotr Majka for critical reading and editing the manuscript. This publication  
384 was made possible by a NIH grant (R01MH116176) and Tobacco Cure Funds from the  
385 Pennsylvania Department of Health to Y.K. and facilitated by NIH grant 1R24OD18559-  
386 01-A2 to K.C. Its contents are solely the responsibility of the authors and do not  
387 necessarily represent the views of the funding agency.

388

389

390

391

392 **Contributions**

393 Conceptualization, Y.K.; label alignment and digitization, U.C.; Dorsal striatum  
394 segmentation, Y.K.; Web visualization, D.V.; Manuscript preparation, Y.K., U.C., K.C.

395

396

397 **Competing interests**

398 None

399

400

401

402

403 **Reference**

404

- 405 1. Majka, P. *et al.* A three-dimensional stereotaxic atlas of the gray short-tailed  
406 opossum (*Monodelphis domestica*) brain. *Brain Struct Funct* **223**, 1779–1795  
407 (2018).
- 408 2. Randlett, O. *et al.* Whole-brain activity mapping onto a zebrafish brain atlas. *Nat*  
409 *Meth* **12**, 1039–1046 (2015).
- 410 3. Hawrylycz, M. *et al.* Digital Atlasing and Standardization in the Mouse Brain.  
411 *PLoS Comput Biol* **7**, e1001065 (2011).
- 412 4. Lin, M. K. *et al.* A high-throughput neurohistological pipeline for brain-wide  
413 mesoscale connectivity mapping of the common marmoset. *Elife* **8**, 72 (2019).
- 414 5. Erö, C., Gewaltig, M.-O., Keller, D. & Markram, H. A Cell Atlas for the Mouse  
415 Brain. *Front. Neuroinform.* **12**, 84 (2018).
- 416 6. Paxinos, G. & Franklin, K. B. J. *The Mouse Brain in Stereotaxic Coordinates*.  
417 (Academic Press, 2008).
- 418 7. Dong, H.-W. The Allen Institute for Brain Science. *The Allen Reference Atlas*,  
419 (Book + CD-ROM). (Wiley, 2008).
- 420 8. Sunkin, S. M. *et al.* Allen Brain Atlas: an integrated spatio-temporal portal for  
421 exploring the central nervous system. *Nucleic Acids Res.* **41**, D996–D1008 (2013).
- 422 9. Kuan, L. *et al.* Neuroinformatics of the Allen Mouse Brain Connectivity Atlas.  
423 *Methods* **73**, 4–17 (2015).
- 424 10. Kim, Y. *et al.* Brain-wide Maps Reveal Stereotyped Cell-Type-Based Cortical  
425 Architecture and Subcortical Sexual Dimorphism. *Cell* **171**, 456–469.e22 (2017).
- 426 11. Renier, N. *et al.* Mapping of Brain Activity by Automated Volume Analysis of  
427 Immediate Early Genes. *Cell* (2016). doi:10.1016/j.cell.2016.05.007
- 428 12. Ragan, T. *et al.* Serial two-photon tomography for automated ex vivo mouse brain  
429 imaging. *Nat Meth* **9**, 255–258 (2012).
- 430 13. Zaslavsky, I., Baldock, R. A. & Boline, J. Cyberinfrastructure for the digital brain:  
431 spatial standards for integrating rodent brain atlases. *Front. Neuroinform.* **8**, 74  
432 (2014).
- 433 14. Azimi, N., Yadollahikhales, G., Argenti, J. P. & Cunningham, M. G.

- 434 Discrepancies in stereotaxic coordinate publications and improving precision using  
435 an animal-specific atlas. *Journal of Neuroscience Methods* **284**, 15–20 (2017).
- 436 15. Van De Werd, H. J. J. M. & Uylings, H. B. M. Comparison of (stereotactic)  
437 parcellations in mouse prefrontal cortex. *Brain Struct Funct* **219**, 433–459 (2013).
- 438 16. Bjerke, I. E. *et al.* Navigating the Murine Brain: Toward Best Practices for  
439 Determining and Documenting Neuroanatomical Locations in Experimental  
440 Studies. *Front Neuroanat* **12**, 82 (2018).
- 441 17. Ullmann, J. F. P., Watson, C., Janke, A. L., Kurniawan, N. D. & Reutens, D. C. A  
442 segmentation protocol and MRI atlas of the C57BL/6J mouse neocortex.  
443 *Neuroimage* **78**, 196–203 (2013).
- 444 18. He, M. *et al.* Strategies and Tools for Combinatorial Targeting of GABAergic  
445 Neurons in Mouse Cerebral Cortex. *Neuron* (2016).  
446 doi:10.1016/j.neuron.2016.08.021
- 447 19. Kim, Y. *et al.* Mapping social behavior-induced brain activation at cellular  
448 resolution in the mouse. *Cell Rep* **10**, 292–305 (2015).
- 449 20. Oh, S. W. *et al.* A mesoscale connectome of the mouse brain. *Nature* **508**, 207–  
450 214 (2014).
- 451 21. Ullmann, J. F. P. *et al.* Segmentation of the C57BL/6J mouse cerebellum in  
452 magnetic resonance images. *Neuroimage* **62**, 1408–1414 (2012).
- 453 22. Watson, C. *et al.* An ontologically consistent MRI-based atlas of the mouse  
454 diencephalon. *Neuroimage* **157**, 275–287 (2017).
- 455 23. Taniguchi, H. *et al.* A Resource of Cre Driver Lines for Genetic Targeting of  
456 GABAergic Neurons in Cerebral Cortex. *Neuron* **71**, 995–1013 (2011).
- 457 24. Zaborszky, L., van den Pol, A. & Gyengesi, E. in *The Mouse Nervous System* 684–  
458 718 (Academic Press, 2012). doi:10.1016/B978-0-12-369497-3.10028-7
- 459 25. Celio, M. R. Calbindin D-28k and parvalbumin in the rat nervous system. *NSC* **35**,  
460 375–475 (1990).
- 461 26. Forloni, G., Hohmann, C. & Coyle, J. T. Developmental expression of  
462 somatostatin in mouse brain. I. Immunocytochemical studies. *Brain Res Dev Brain*  
463 *Res* **53**, 6–25 (1990).
- 464 27. Lin, Y.-T. *et al.* Conditional Deletion of Hippocampal CA2/CA3a Oxytocin

- 465 Receptors Impairs the Persistence of Long-Term Social Recognition Memory in  
466 Mice. *Journal of Neuroscience* **38**, 1218–1231 (2018).
- 467 28. Harris, J. A. *et al.* Anatomical characterization of Cre driver mice for neural circuit  
468 mapping and manipulation. *Front Neural Circuits* **8**, 76 (2014).
- 469 29. Hintiryan, H. *et al.* The mouse cortico-striatal projectome. *Nat Neurosci* **19**, 1100–  
470 1114 (2016).
- 471 30. Hunnicutt, B. J. *et al.* A comprehensive excitatory input map of the striatum  
472 reveals novel functional organization. *Elife* **5**, (2016).
- 473 31. Hooks, B. M. *et al.* Topographic precision in sensory and motor corticostriatal  
474 projections varies across cell type and cortical area. *Nat Commun* **9**, 3549 (2018).
- 475 32. Tovote, P., Fadok, J. P. & Lüthi, A. Neuronal circuits for fear and anxiety. *Nat Rev*  
476 *Neurosci* **16**, 317–331 (2015).
- 477 33. Masri, R. *et al.* Zona incerta: a role in central pain. *J Neurophysiol* **102**, 181–191  
478 (2009).
- 479 34. Chou, X.-L. *et al.* Inhibitory gain modulation of defense behaviors by zona incerta.  
480 *Nat Commun* **9**, 1151 (2018).
- 481 35. Ballinger, E. C., Ananth, M., Talmage, D. A. & Role, L. W. Basal Forebrain  
482 Cholinergic Circuits and Signaling in Cognition and Cognitive Decline. *Neuron*  
483 **91**, 1199–1218 (2016).
- 484 36. Gielow, M. R. & Zaborszky, L. The Input-Output Relationship of the Cholinergic  
485 Basal Forebrain. *Cell Rep* **18**, 1817–1830 (2017).
- 486 37. Tappan, S. J. *et al.* Automatic navigation system for the mouse brain. *J Comp*  
487 *Neurol* (2019). doi:10.1002/cne.24635
- 488 38. Bakker, R., Tiesinga, P. & Kötter, R. The Scalable Brain Atlas: Instant Web-Based  
489 Access to Public Brain Atlases and Related Content. *Neuroinformatics* **13**, 353–  
490 366 (2015).
- 491 39. Eastwood, B. S. *et al.* Whole mouse brain reconstruction and registration to a  
492 reference atlas with standard histochemical processing of coronal sections. *J Comp*  
493 *Neurol* e24602 (2018). doi:10.1002/cne.24602
- 494 40. Ju, G. & Swanson, L. W. Studies on the cellular architecture of the bed nuclei of  
495 the stria terminalis in the rat: I. Cytoarchitecture. *J Comp Neurol* **280**, 587–602

- 496 (1989).
- 497 41. Dong, H.-W., Petrovich, G. D. & Swanson, L. W. Topography of projections from  
498 amygdala to bed nuclei of the stria terminalis. *Brain Res Brain Res Rev* **38**, 192–  
499 246 (2001).
- 500 42. Markram, H. *et al.* Reconstruction and Simulation of Neocortical Microcircuitry.  
501 *Cell* **163**, 456–492 (2015).
- 502 43. Dorr, A. E., Lerch, J. P., Spring, S., Kabani, N. & Henkelman, R. M. High  
503 resolution three-dimensional brain atlas using an average magnetic resonance  
504 image of 40 adult C57Bl/6J mice. *Neuroimage* **42**, 60–69 (2008).
- 505 44. Johnson, G. A. *et al.* Waxholm space: an image-based reference for coordinating  
506 mouse brain research. *Neuroimage* **53**, 365–372 (2010).
- 507 45. Ecker, J. R. *et al.* The BRAIN Initiative Cell Census Consortium: Lessons Learned  
508 toward Generating a Comprehensive Brain Cell Atlas. *Neuron* **96**, 542–557  
509 (2017).
- 510 46. Chen, Y. *et al.* An active texture-based digital atlas enables automated mapping of  
511 structures and markers across brains. *Nat Meth* **16**, 341–350 (2019).
- 512 47. Zingg, B. *et al.* Neural networks of the mouse neocortex. *Cell* **156**, 1096–1111  
513 (2014).
- 514 48. Jeong, M. *et al.* Comparative three-dimensional connectome map of motor cortical  
515 projections in the mouse brain. *Sci Rep* **6**, 20072 (2016).
- 516 49. Bienkowski, M. S. *et al.* Integration of gene expression and brain-wide  
517 connectivity reveals the multiscale organization of mouse hippocampal networks.  
518 *Nat Neurosci* **21**, 1628–1643 (2018).
- 519 50. Shiffman, S., Basak, S., Kozlowski, C. & Fuji, R. N. An automated mapping  
520 method for Nissl-stained mouse brain histologic sections. *Journal of Neuroscience*  
521 *Methods* **308**, 219–227 (2018).
- 522 51. Niedworok, C. J. *et al.* aMAP is a validated pipeline for registration and  
523 segmentation of high-resolution mouse brain data. *Nat Commun* **7**, 11879 (2016).
- 524 52. Boline, J., Lee, E.-F. & Toga, A. W. Digital atlases as a framework for data  
525 sharing. *Front Neurosci* **2**, 100–106 (2008).
- 526 53. Klein, S., Staring, M., Murphy, K., Viergever, M. A. & Pluim, J. P. W. elastix: a

527 toolbox for intensity-based medical image registration. *IEEE Trans Med Imaging*  
528 **29**, 196–205 (2010).

529

530

531

532



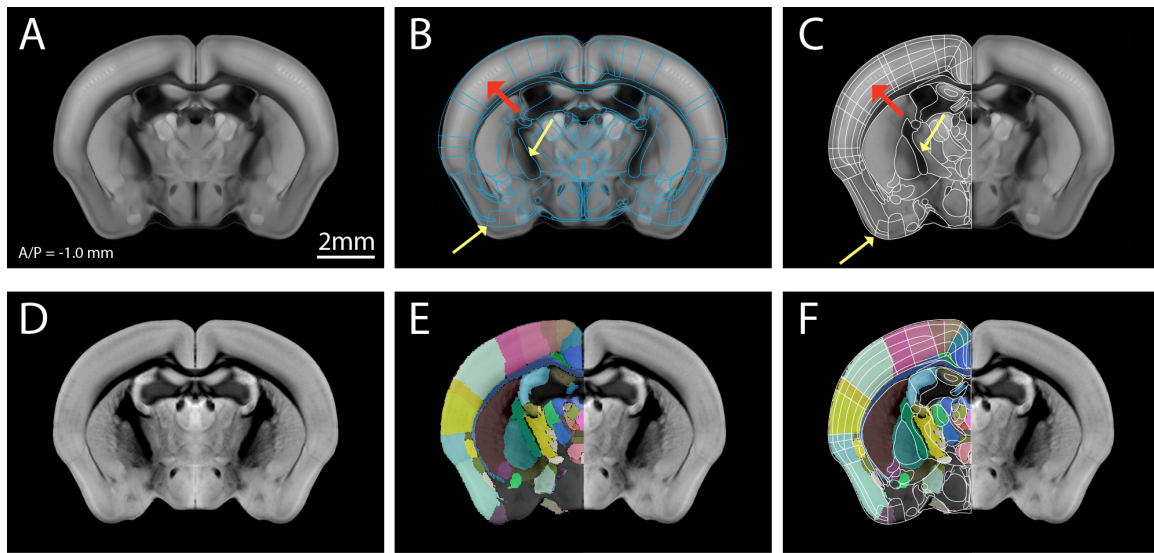

533

534

535 **Figure 1. Initial import and alignment of the Franklin-Paxinos labels onto the Allen**  
536 **Common Coordinate Framework**

537 (A) The Allen Common Coordinate Framework (CCF) that serves as base anatomical  
538 platform. A/P represent Bregma anterior/posterior coordinate. (B) Initial import of the  
539 Franklin-Paxinos (FP) vector labels in the CCF. (C) Manual alignment based on  
540 anatomical features in the CCF. Yellow arrows highlight distinct anatomical boundaries  
541 based on edges and white matter track. Red arrows indicate layer 4 in the somatosensory  
542 barrel cortex. (D) MRI images registered to the same CCF plane in (A). (E) Original FP  
543 based labels drawn in the MRI atlas registered to the CCF. Lack of labels in  
544 hypothalamic and amygdala regions are due to missing labels in the original MRI labels.  
545 (F) Further adjustment of anatomical delineation (white lines) based on the MRI labels.

546

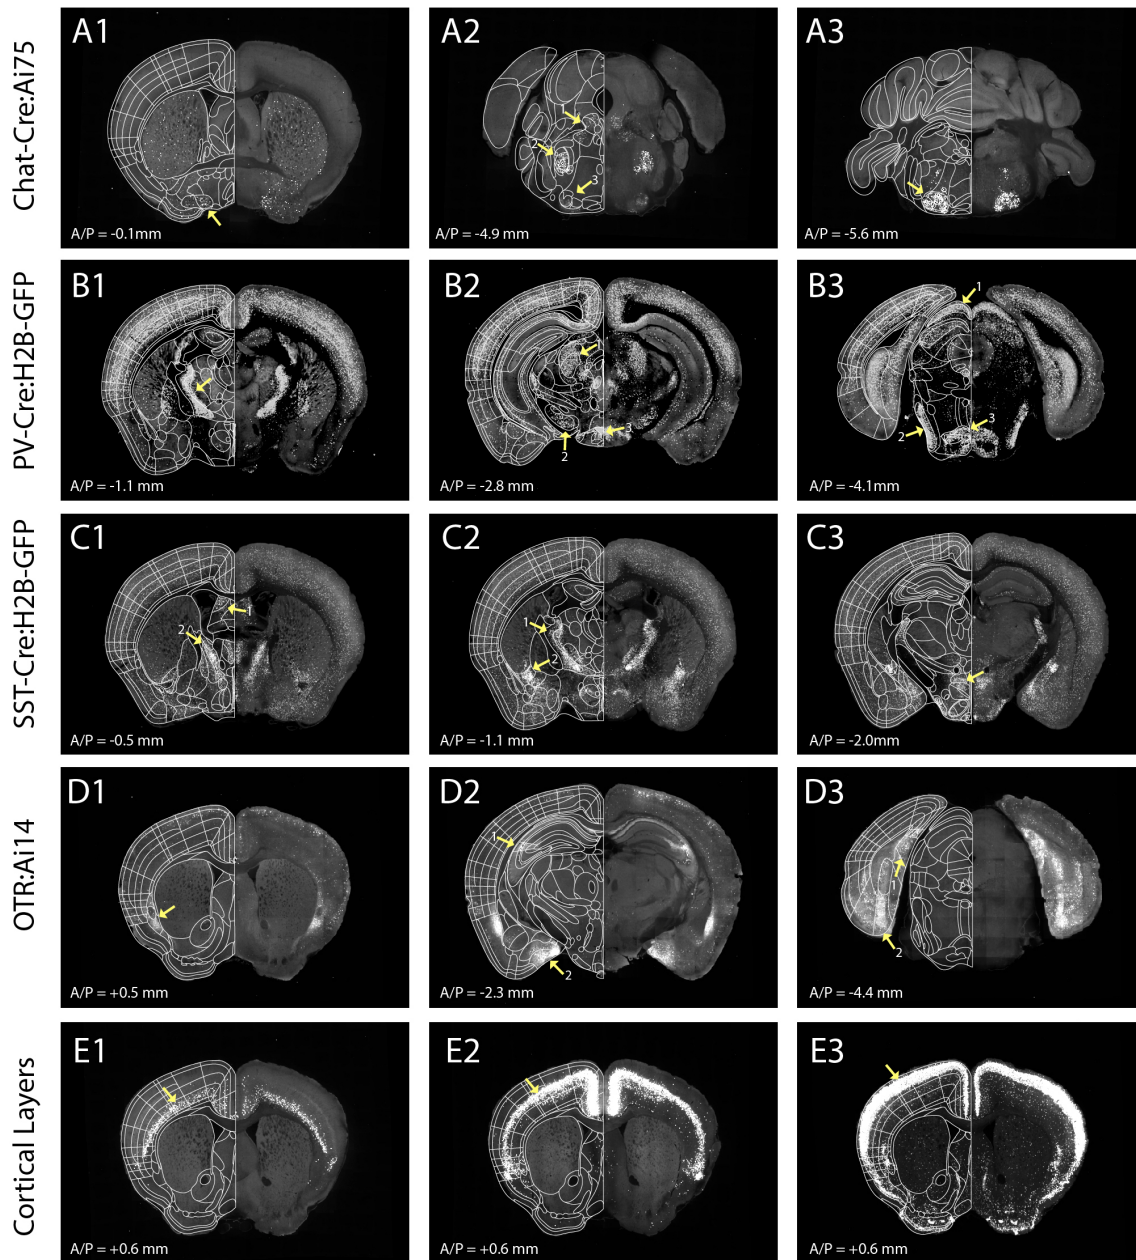

556 trigeminal nuclei (arrow 2), the lateral superior olive (arrow 3), and (A3) the facial  
557 nucleus (arrow).

558 (B) PV-Cre:H2B-GFP brain to delineate (B1) the reticular nucleus (arrow), (B2) th  
559 anterior pretectal nucleus (arrow 1), the substantia nigra, reticular part (arrow 2), and the  
560 retromamillary nucleus (arrow 3) as well as (B3) the superficial gray layer superior  
561 colliculus (arrow 1), the ventral nucleus of the lateral lemniscus (arrow 2), and the  
562 reticulotegmental nucleus of the pons, pericentral part (arrow 3).

563 (C) SST-Cre:H2B-GFP brain to delineate (C1) the cerebral nuclei, such as the lateral  
564 septal nucleus, dorsal part (arrow 1) and the bed nuclei of the stria terminalis medial  
565 division posteromedial part (arrow 2), (C2) the reticular nucleus (arrow 1) and the central  
566 amygdaloid nuclei (arrow 2), and (C3) hypothalamic structures, such as the dorsomedial  
567 hypothalamic nuclei dorsal and ventral parts (arrow).

568 (D) OTR: Ai14 brain to delineate (D1) the dorsal endopiriform nucleus (arrow), (D2)  
569 CA2 (arrow 1), the posteromedial cortical amygdala (arrow 2), and (D3) the caudomedial  
570 entorhinal cortex (arrow1) as well as the postsubiculum (arrow 2).

571 (E) Cortical layers defined by (E1) Ntsr-Cre: Ai75 for layer 6, (E2) Rbp4-Cre: Ai75 for  
572 layer 5, and (3) Cux2-Cre: Ai75 for layer 2/3.

573

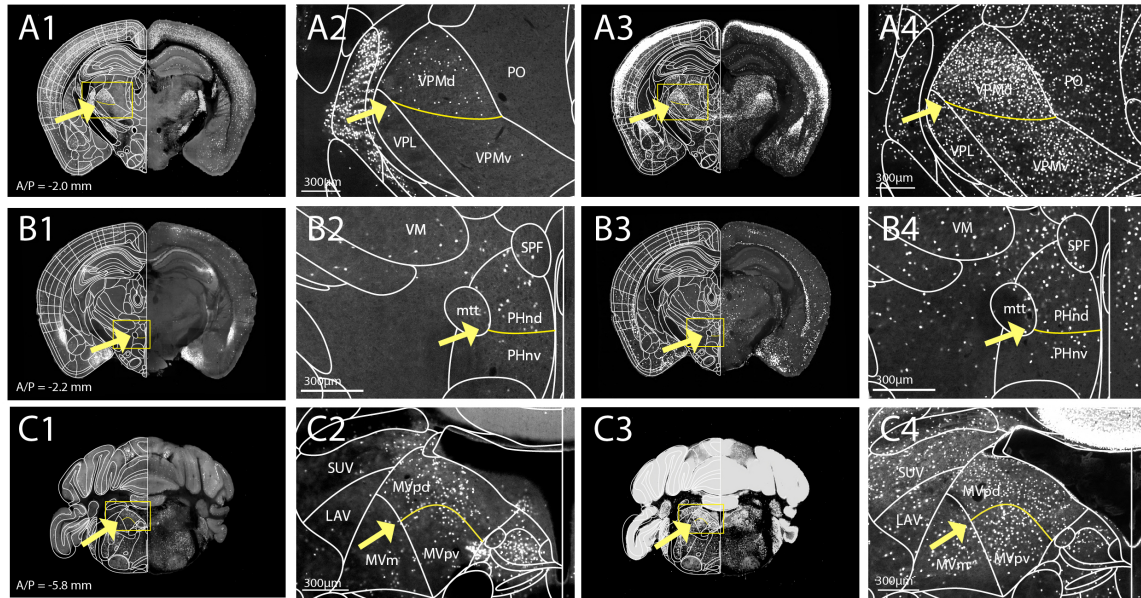

574

575

576 **Figure 3: Additional segmentations based on distinct expression from marker brains**

577 (A-C) Examples of marker brains to further segment structures. New segmentations are  
578 marked by yellow lines. (A) PV-Cre:H2B-GFP (A1-2) and Ctgf-Cre: Ai75 (A3-4) marker  
579 brains were utilized to further segment ventral posteromedial nucleus of the thalamus  
580 (VPM) to dorsal and ventral parts (VPMd and VPMv, respectively). (B) OTR-Cre: Ai14  
581 (B1-2) and Ctgf-Cre: Ai75 (B3-4) used to segment dorsal and ventral parts (PHnd and  
582 PHnv, respectively) of the posterior hypothalamic nucleus (PHn). (C) SST-Cre:H2B-GFP  
583 (D1-2) and PV-Cre:H2B-GFP (D3-4) used to segment the medial vestibular nucleus,  
584 parvicellular part (MVp) to dorsal and ventral parts (MVpd and MVpv, respectively). See  
585 Table S2 for full names of acronyms.

586



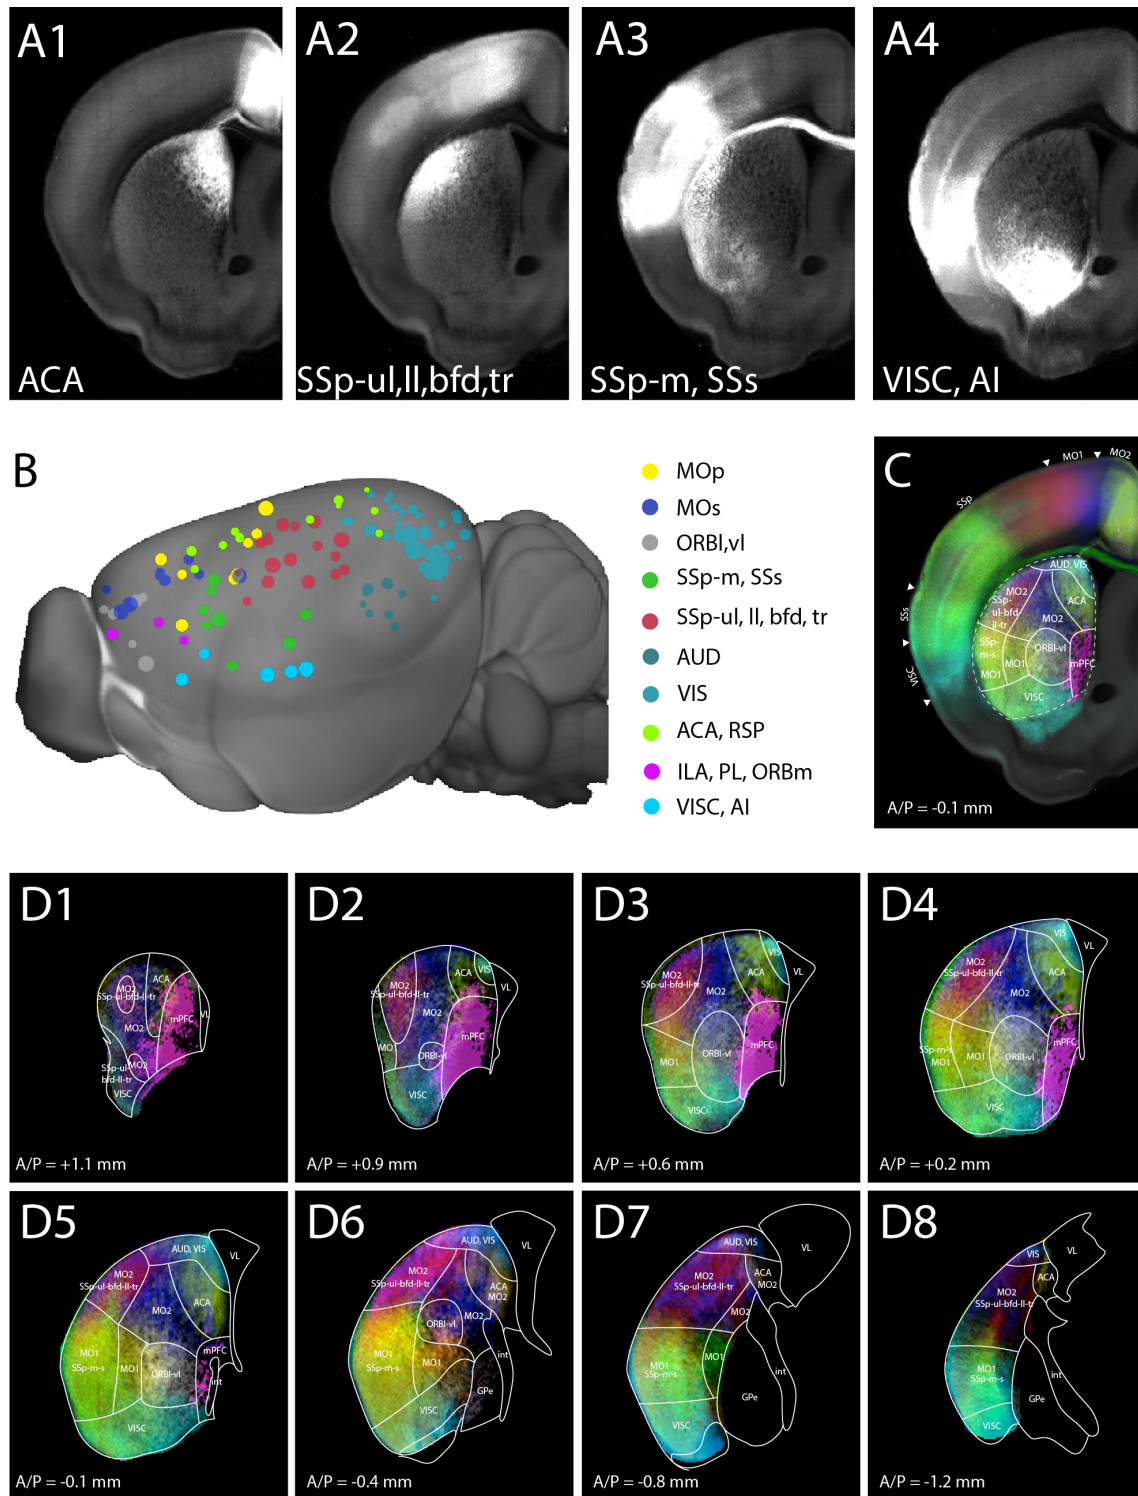

587

588

589 **Figure 4: Cortico-striatal projection based striatum segmentations**

590 (A) Anterograde tracing datasets from different cortical domains registered into the CCF.

591 A1 for the anterior cingulate cortex (ACA), A2 for the primary somatosensory cortex

592 (SSp), upper limb (ul), lower limb (ll), barrel field (bfd), and trunk (tr) area. A3 for the  
593 SSp, mouth (m) and secondary (s). A4 for the visceral (VISC) and the agranular insular  
594 cortex (AI). (B) 129 datasets clustered into 10 groups based on cortical input regions.  
595 Datasets in the same cluster have the same color. (C) Example of striatal segmentation  
596 based on cortico-striatal projection patterns. (D) Representative images of new dorsal  
597 striatum segmentations throughout several Bregma A/P planes.  
598 Full name of acronym can be found in Table S2.  
599

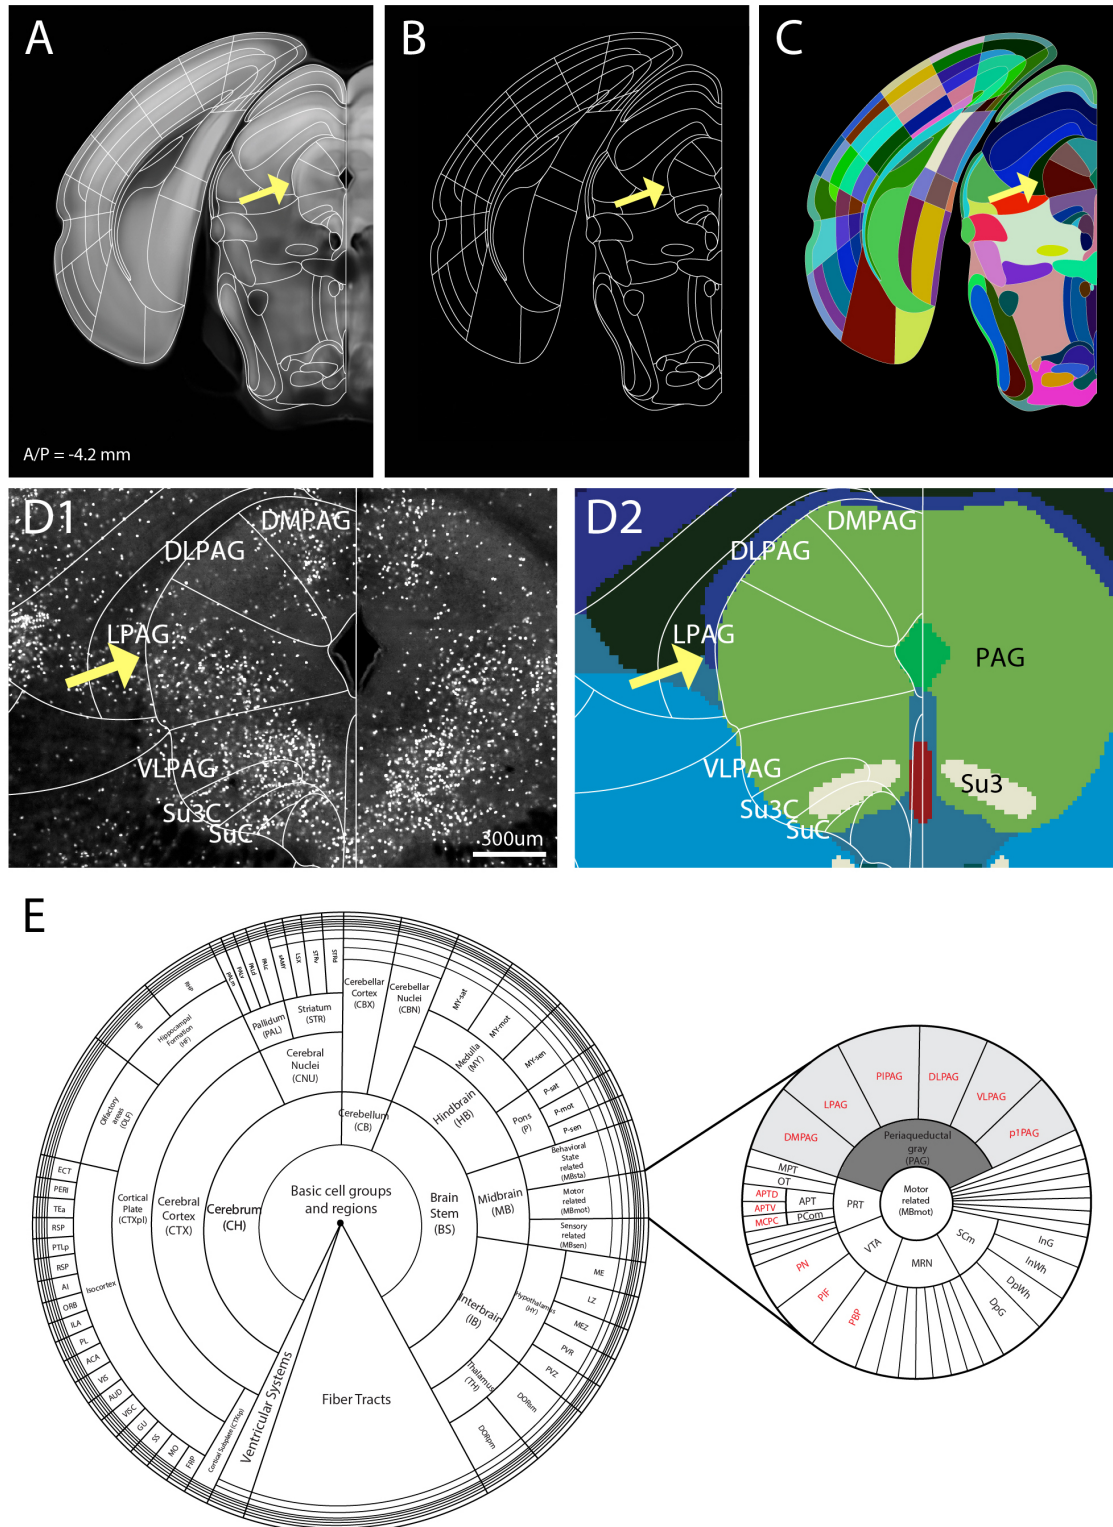

600

601

602 **Figure 5: Digitization of anatomical structures**

603 (A) Example of our highly segmented label on the CCF. Yellow arrows highlight the  
604 lateral subdivision of periaqueductal gray (PAG). (B) Exported delineation lines. (C)  
605 Digitization of labels with unique numerical ID for each anatomical structure. Different  
606 color of each structure pertains to different number. (D) SST-Cre:H2B-GFP showed  
607 distinct subregions in PAG with different cell density level. (D1) Our labels (white font)  
608 divide PAG into 6 different subregions, as can be seen with the specific enrichment of  
609 SST neurons in DLPAG and LPAG (yellow arrow). (D2) In contrast, the Allen labels  
610 (color labels in the background) showed only 2 segmentations within the PAG (black  
611 font). (E) Hierarchical organization of anatomical labels based on the Allen ontology.  
612 Numerical IDs of individual structures assigned within parent structures for region-level  
613 and individual structure-level data analysis. For example, the PAG (shaded dark gray) is  
614 the parent structure of 6 subdivided structures (shaded light gray). Red font labels refer to  
615 structures further divided by the FP labels that are not present in the Allen labels.  
616



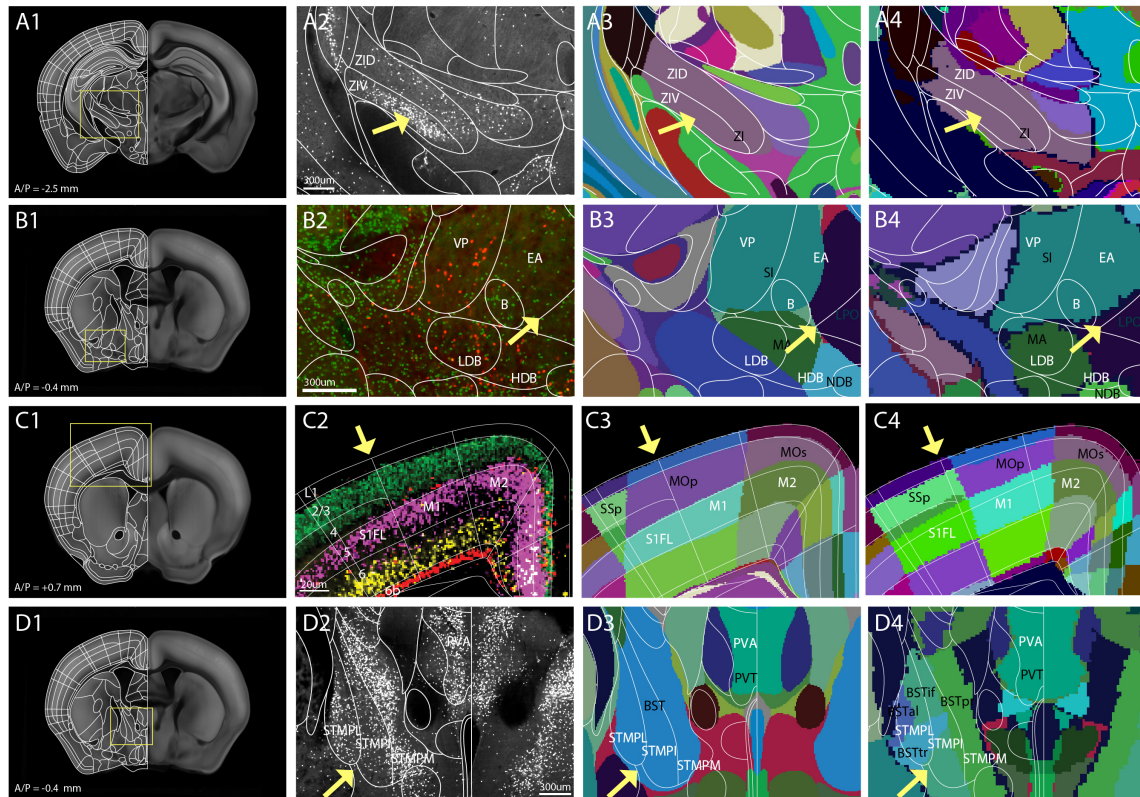

617

618

619 **Figure 6: Comparison between the Allen and our new labels**

620 The first column: Our highly segmented labels on the Allen CCF, The second column;  
 621 our labels (white lines) with marker brain background, The third column: comparison  
 622 between our labels and the latest Allen labels (colored background), The fourth column:  
 623 comparisons between our labels and the original Allen labels (colored background). (A2  
 624 – D4) Anatomical names in black and white are from the Allen and our labels,  
 625 respectively. (A2-4) PV-Cre:H2B-GFP (A2) to identify subregions in zona incerta (ZI).  
 626 Low in dorsal and high in ventral parts (ZID and ZIV, respectively) in our labels while  
 627 the original and the new Allen labels have a single combined structure for ZI. (B2-4) (B2)  
 628 Virtual overlay of Chat-Cre: Ai75 (red) and SST-Cre:H2B-GFP (green) to compare basal  
 629 forebrain regions. (B3-4) Our labels further segregate the single structure defined as the  
 630 substantia innominata (SI, Allen) into the ventral pallidum (VP) and the extended  
 631 amygdala (EA). Yellow arrow highlights border between basal forebrain and  
 632 hypothalamus. (C2-4) Disagreed borders between the somatosensory and the motor  
 633 cortices. Yellow arrow highlights border between the somatosensory and motor cortices.

634 (C2) Virtual overlay of pseudo colored Cux2: Ai75 (L2/3, green), Rbp4: Ai75 (L5,  
635 magenta), Ntsr1: Ai75 (L6, yellow), and Ctgf: Ai75 (L6b, red). Note the lack of  
636 Cux2: Ai75 and Rbp4: Ai75 signal in the layer 4 of the somatosensory cortex. (D2-4) The  
637 BST is divided into several subregions in our labels compared to a single structure of the  
638 BST in the new Allen labels, despite the original version with finer delineations for this  
639 structure. See table S2 for the abbreviation.  
640

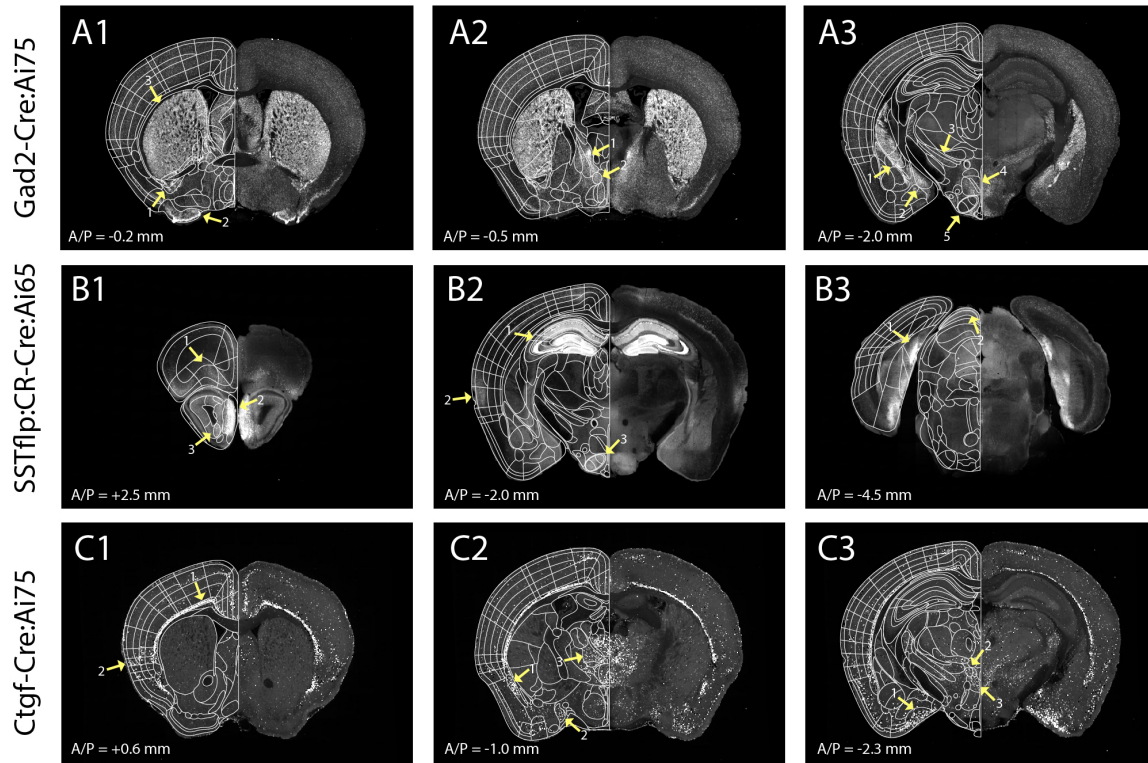

641

642

643 **Figure S1, Related to Figure 2: Additional marker brains used for alignment of**  
644 **anatomical borders**

645 (A) Gad2-Cre: Ai75 brain to delineate (A1) the interstitial nucleus of the posterior limb  
646 of the anterior commissure (arrow 1), the olfactory tubercle (arrow 2) and the caudate  
647 putamen (arrow 3), (A2) the bed nuclei of the stria terminalis medial division  
648 posteromedial part (arrow 1), the striohypothalamic nucleus (arrow 2), and (A3) the  
649 central amygdaloid nuclei (arrow 1), the medial amygdala posterodorsal division (arrow  
650 2), the zona incerta (arrow 3) and other hypothalamic structures such as the dorsomedial  
651 hypothalamic nucleus, ventral part (arrow 4) and the ventromedial hypothalamic nucleus  
652 (VMH, arrow 5).

653 (B) SSTflp:CR-Cre: Ai65 transgenic mouse line to delineate following structures: (B1)  
654 the orbital cortex area (arrow 1), layers of the olfactory bulb (arrow 2), the anterior  
655 olfactory area, ventral part (arrow 3), (B2) the CA2 of hippocampus (arrow 1), the  
656 ectorhinal cortex (arrow 2), the ventromedial hypothalamic nucleus (arrow 3), (B3) the  
657 postsubiculum (arrow 1), and superficial gray layer of the superior colliculus (arrow 2).

658 (C) Ctgf-Cre: Ai75 transgenic mouse line to delineate following structures: (C1) the  
659 granular insular cortex (arrow), (2) the dorsal endopiriform nucleus (arrow 1), the medial  
660 amygdalar nucleus, anterodorsal (arrow 2), the thalamic structures such as anteromedial  
661 thalamic nucleus (arrow 3), (3) the posteromedial cortical amygdala (arrow 1), the  
662 subparafascicular thalamic nucleus (arrow 2), and the posterior hypothalamic nucleus,  
663 dorsal part (arrow 3).  
664

665 **Supplementary Tables and Files**

666

667 **Table S1, Related to Figure 2 and S1: Transgenic mouse list**

668 List of all transgenic mouse brains used for fine label alignments and further  
669 segmentations. Cell type specific drivers and corresponding reporter lines are outlined, as  
670 well as the specific structures that were highlighted from each line. See Table S2 for the  
671 abbreviation.

672

673

674 **Table S2, Related to Figure 5: Label identification numbers**

675 List of the FP based label full names, abbreviation, numerical ID, parent structures for the  
676 ontology, and corresponding Allen label nomenclature. Lack of clearly matched areas  
677 between our FP based labels and the Allen labels was left blank.

678

679

680 **Supplementary File 1: A series of digitized labels in every 100  $\mu\text{m}$  z spacing**

681 The file name contains the information about Bregma anterior posterior coordinate of  
682 each image

683

684

685 **Supplementary File 2: A series of matched CCF background planes in every 100  $\mu\text{m}$   
686 z spacing**

687 Z numbers in the file name are matched with label numbers in Supplementary File 1

688
